# Supplementary material
Source: publisher figshare collection journal article supplement (https://sage.figshare.com/ndownloader/files/17615306)
Supplement: Supplementary file 1 [file 17615306]

## Supplementary material 1: Interview Topic Guide – Industry

### Briefing

The purpose of briefing in the interview is to inform the interviewee about:

- The interviewer's background
- The purpose of the master thesis
- The interviewee's anonymity
- Recording of the interview and that the recording will be used for data analysis
- That the interviewee can at any time choose not to answer a question

### Interview questions

| Theme                                                                                                             | Question                                                                                                                                                                                                                                                                                   |
|-------------------------------------------------------------------------------------------------------------------|--------------------------------------------------------------------------------------------------------------------------------------------------------------------------------------------------------------------------------------------------------------------------------------------|
| <b>Interviewee's background</b><br><i>The interviewee works either in regulatory affairs or pharmacovigilance</i> | Thank you for your willingness to participate today                                                                                                                                                                                                                                        |
|                                                                                                                   | Can you start by telling me about your educational background?                                                                                                                                                                                                                             |
|                                                                                                                   | Can you tell me about your job, what are your main focus areas?                                                                                                                                                                                                                            |
|                                                                                                                   | Can you tell me about your experience within regulatory affairs/PV? <ul style="list-style-type: none"> <li>- How many years have you worked with regulatory affairs/PV?</li> </ul>                                                                                                         |
|                                                                                                                   | In your own words what is the responsibility of the MAH in pharmacovigilance and regulatory affairs? In risk minimization? Is it perceived differently in the different departments in the company?                                                                                        |
|                                                                                                                   | How many DHPCs have you been involved during your time in (company)?                                                                                                                                                                                                                       |
| <b>Preparation of DHPCs</b>                                                                                       | How do you prepare DHPCs? <ul style="list-style-type: none"> <li>- How many people are involved?</li> <li>- How many departments and teams are involved?</li> <li>- Are healthcare professionals' organizations or other societies involved in the preparation process and why?</li> </ul> |
|                                                                                                                   | How are you informed that a safety concern is identified and that a DHPC should be prepared?                                                                                                                                                                                               |
|                                                                                                                   | Follow-up: Does the level of commitment of employees depend on the seriousness of the safety concern?                                                                                                                                                                                      |
|                                                                                                                   | What do you give consideration to when preparing DHPCs? (compliance to regulation vs. HCP change in behavior)                                                                                                                                                                              |
|                                                                                                                   | When preparing a DHPC, which general issues do you find yourself discussing with your colleagues?                                                                                                                                                                                          |
|                                                                                                                   | What is the process for disseminating a DHPC in this company?                                                                                                                                                                                                                              |
|                                                                                                                   | Follow-up: Have your company ever used patient and healthcare professionals' organizations to disseminate DHPCs and what was the rationale behind this choice?                                                                                                                             |
|                                                                                                                   |                                                                                                                                                                                                                                                                                            |

|                                      |                                                                                                                                                                                                                                                                                                                                                                                                                                                                                                                                                                                 |
|--------------------------------------|---------------------------------------------------------------------------------------------------------------------------------------------------------------------------------------------------------------------------------------------------------------------------------------------------------------------------------------------------------------------------------------------------------------------------------------------------------------------------------------------------------------------------------------------------------------------------------|
|                                      | What happens if your company fails to disseminate a DHPC?                                                                                                                                                                                                                                                                                                                                                                                                                                                                                                                       |
| <b>Template and content of DHPCs</b> | <p>What do you think about the template?</p> <p>Follow-up: Do you think the template, format and structure could be optimized and why?</p> <p>In your opinion, would you prefer if the structure was more open?</p> <p>Have you ever felt that your morality was compromised in the process of preparing a DHPC?</p> <p>Do you feel your rational considerations are compromised when following a template?</p>                                                                                                                                                                 |
| <b>Collaboration with regulator</b>  | <p>How does the collaboration between the NCA, EMA and you work?</p> <p>How would you describe the distribution of work; would you say that it is a joint effort or does the involvement in the process differ between you and the EMA/NCA?</p> <p>What arguments do you use in the collaboration in relation to the content and wording and what arguments does the EMA/NCA use?</p> <p>Follow-up: Do you put emphasis in different sections/issues on content/wording?</p> <p>Does the DHPC process affect the relationship between regulator and your company – and how?</p> |
| <b>Effectiveness of DHCPs</b>        | <p>What is your general opinion about DHPCs as a risk minimization measure?</p> <p>Follow-up: Do you find DHPCs as an effective risk minimization measure?</p> <p>How does your company measure effectiveness of DHPCs?</p>                                                                                                                                                                                                                                                                                                                                                     |
| <b>Regulation perspective</b>        | <p>The 2012 PV legislation lead to increased focus on risk communication. How would you say the DHPC process has changed?</p> <p>Follow-up: How has the increased focus on risk communication changed your behavior in relation to DHPCs?</p> <p>Can you name other changes in regulation that affects your behavior?</p>                                                                                                                                                                                                                                                       |
| <b>Society perspective</b>           | How does your behavior towards DHPCs change if a safety concern has gotten media attention?                                                                                                                                                                                                                                                                                                                                                                                                                                                                                     |
| <b>Personal morality</b>             | <p>What do you think are the challenges of the current DHPC setup in regards to public health? In regards to industry-society relations? In regards to industry-HCP relations?</p> <p>Follow-up: Do you think DHPCs are able to change the behavior of physicians in the current format?</p>                                                                                                                                                                                                                                                                                    |

|  |                                                                                                                                           |
|--|-------------------------------------------------------------------------------------------------------------------------------------------|
|  | The literature states that healthcare professionals find the MAHs an unreliable sender source and that DHCPs are not always read.         |
|  | Does or how does this influence your opinion of DHCPs and does it influence how you act in the process and why?                           |
|  | In your opinion, could or should the process (in terms of preparation, collaboration with EMA/NCA and dissemination) be done differently? |
|  | Follow-up: Have you ever felt that you would have done it differently?                                                                    |

#### Debriefing

I have no further questions; do you have anything else to add that hasn't been brought up?

- Can I contact you in the future if I find something from the transcription that I need you to clarify?

Do you think that from what we have talked about, that I should speak to someone else in this company?

### Supplementary material 2: Interview Topic Guide – EMA

#### Briefing

The purpose of briefing in the interview is to inform the interviewee about:

- The interviewer's background
- The purpose of the master thesis
- The interviewee's anonymity (although interviewee can agree not to be anonymous)
- Recording of the interview and that the recording will be used for data analysis
- That the interviewee can at any time choose not to answer a question

#### Interview questions

| Theme                           | Question                                                                                              |
|---------------------------------|-------------------------------------------------------------------------------------------------------|
| <b>Interviewee's background</b> | Can you start by telling me about your educational background?                                        |
|                                 | Can you tell me about your job, what are your main focus areas?                                       |
|                                 | How many DHPCs have you been involved during your time at EMA?                                        |
|                                 | What is the responsibility of EMA in terms of risk minimization activities?                           |
|                                 |                                                                                                       |
| <b>Preparation of DHPCs</b>     | What is the responsibility of EMA in terms of preparation of DHPCs?                                   |
|                                 | How are you informed that a safety concern is identified and that a DHPC should be prepared?          |
|                                 | Follow-up: Does the level of commitment of employees depend on the seriousness of the safety concern? |
|                                 | Which general issues do you find yourself discussing with your colleagues in terms of DHPCs?          |
|                                 |                                                                                                       |

|                                      |                                                                                                                                                                                                       |
|--------------------------------------|-------------------------------------------------------------------------------------------------------------------------------------------------------------------------------------------------------|
| <b>Template and content of DHPCs</b> | What do you think about the template?<br>Follow-up: Do you think the template, format and structure could be optimized and why?                                                                       |
|                                      | In your opinion, would you prefer if the structure was more open?                                                                                                                                     |
|                                      | Have you ever felt that your morality was compromised in the process of preparing a DHPC?                                                                                                             |
|                                      | Do you feel your rational considerations are compromised when following a template?                                                                                                                   |
|                                      |                                                                                                                                                                                                       |
| <b>Collaboration with Industry</b>   | How does the collaboration between the companies and EMA work?                                                                                                                                        |
|                                      | How would you describe the distribution of work; would you say that it is a joint effort or does the involvement in the process differ between EMA and the companies?                                 |
|                                      | What arguments do you use in the collaboration in relation to the content and wording and what arguments do the companies use? Is there a difference between companies in terms of the collaboration? |
|                                      | Follow-up: Do you put emphasis in different sections/issues on content/wording?                                                                                                                       |
|                                      | Does the DHPC process affect the relationship between EMA and the companies – and how?                                                                                                                |
|                                      |                                                                                                                                                                                                       |
| <b>Effectiveness of DHCPs</b>        | What is your general opinion about DHPCs as a risk minimization measure?                                                                                                                              |
|                                      | Follow-up: Do you find DHPCs as an effective risk minimization measure?                                                                                                                               |
|                                      | Do you feel that companies are good in measuring effectiveness of DHPCs and why/why not? What could be done differently?                                                                              |
|                                      |                                                                                                                                                                                                       |
| <b>Regulation perspective</b>        | The 2012 PV legislation lead to increased focus on risk communication. How would you say the DHPC process has changed?                                                                                |
|                                      | Follow-up: How has the increased focus on risk communication changed your behavior in relation to DHPCs?                                                                                              |
|                                      |                                                                                                                                                                                                       |
| <b>Personal morality</b>             | What do you think are the challenges of the current DHPC setup in regards to public health? In regards to industry-authority relations? In regards to authority-HCP relations?                        |
|                                      | Follow-up: Do you think DHPCs are able to change the behavior of physicians in the current format?                                                                                                    |
|                                      | The literature states that healthcare professionals do not always read DHPCs.                                                                                                                         |
|                                      | Does or how does this influence your opinion of DHPCs and does it influence how you act in the process and why?                                                                                       |

|  |                                                                                                                                                                                                                                      |
|--|--------------------------------------------------------------------------------------------------------------------------------------------------------------------------------------------------------------------------------------|
|  | <p>In your opinion, could or should the process (in terms of preparation, collaboration with the companies and dissemination) be done differently?</p> <p>Follow-up: Have you ever felt that you would have done it differently?</p> |
|--|--------------------------------------------------------------------------------------------------------------------------------------------------------------------------------------------------------------------------------------|

#### Debriefing

I have no further questions; do you have anything else to add that hasn't been brought up?

- Can I contact you in the future if I find something from the transcription that I need you to clarify?
